# Supplementary material
Source: PubMed Central journal article supplement (PMC2715307)
Supplement: supp_33_2_130__1.pdf [file supp_33_2_130__1.pdf]

***In Vivo* Effects of Ozone Exposure on Protein Adduct Formation by  
1-Nitronaphthalene in Rat Lung**

Åsa M. Wheelock, Bridget C. Boland, Margaret Isbell, Dexter Morin, Teresa C.  
Wegesser, Charles G. Plopper, and Alan R. Buckpitt

Departments of Molecular Biosciences and Anatomy, Physiology, and Cell Biology, School of  
Veterinary Medicine, University of California, Davis, California

**Online Data Supplement**

**Table E1: LC-MS/MS Data on Peptides Used for Identification with SEQUEST and DTASelect**

| PROTEIN |            | PEPTIDE INFORMATION |        |           |                       |        |                                    |
|---------|------------|---------------------|--------|-----------|-----------------------|--------|------------------------------------|
| Spot#   | Accession# | XCorr               | DeltCN | ObsM+H+   | SpScore               | Ion%   | Sequence                           |
| 1       | spt P42930 | 3.2364              | 0.2868 | 1150.8555 | 1454.0                | 94.40% | R.LFDQAFGVPR.F                     |
|         |            | 5.7611              | 0.3826 | 3194.8347 | 1174.4                | 32.50% | R.KYTLPPGVDPTLVSSSLSPGTLTVEAPLPK.A |
|         |            | 4.8242              | 0.2805 | 3067.0454 | 1082.3                | 27.60% | K.YTLPPGVDPTLVSSSLSPGTLTVEAPLPK.A  |
|         |            | 3.5317              | 0.3488 | 1833.5730 | 638.1                 | 59.40% | K.AVTQSAEITIPVTFEAR.A              |
| 2       | spt P42930 | 3.6261              | 0.3304 | 1150.6313 | 1478.5                | 94.40% | R.LFDQAFGVPR.F                     |
|         |            | 3.7348              | 0.4270 | 1800.9637 | 533.6                 | 40.00% | R.VSLDVNHFAPPEELTVK.T              |
|         |            | 6.4847              | 0.5031 | 3196.2330 | 1294.6                | 33.30% | R.KYTLPPGVDPTLVSSSLSPGTLTVEAPLPK.A |
|         |            | 4.2066              | 0.5372 | 1833.4656 | 634.6                 | 59.40% | K.AVTQSAEITIPVTFEAR.A              |
| 3       | spt P42930 | 3.9170              | 0.3018 | 1150.5190 | 1589.8                | 94.40% | R.LFDQAFGVPR.F                     |
|         |            | 3.9522              | 0.4082 | 1379.3694 | 1160.2                | 67.90% | R.PLPAATAEGPAAVTL.A                |
|         |            | 2.4261              | 0.1126 | 1076.5264 | 667.7                 | 83.30% | R.QLSSGVSEIR.Q                     |
|         |            | 2.0989              | 0.1824 | 933.0427  | 320.1                 | 62.50% | K.EGVVEITGK.H                      |
|         |            | 5.7700              | 0.4181 | 3194.8830 | 1185.4                | 32.50% | R.KYTLPPGVDPTLVSSSLSPGTLTVEAPLPK.A |
|         |            | 6.1254              | 0.3844 | 3067.0486 | 1313.1                | 29.30% | K.YTLPPGVDPTLVSSSLSPGTLTVEAPLPK.A  |
|         |            | 4.5685              | 0.5010 | 1726.5776 | 1409.7                | 75.00% | S.SSLSPGTLTVEAPLPK.A               |
|         |            | 4.9781              | 0.4433 | 1639.5303 | 910.3                 | 63.30% | S.SLSPGTLTVEAPLPK.A                |
| 2.7061  | 0.2320     | 1834.3870           | 450.1  | 50.00%    | K.AVTQSAEITIPVTFEAR.A |        |                                    |
| 4       | spt P42930 | 3.7716              | 0.2846 | 1150.9336 | 1477.6                | 94.40% | R.LFDQAFGVPR.F                     |
|         |            | 2.6976              | 0.2673 | 1379.8013 | 1043.1                | 64.30% | R.PLPAATAEGPAAVTL.A                |
|         |            | 4.0711              | 0.2784 | 1799.4629 | 1082.0                | 60.00% | R.VSLDVNHFAPPEELTVK.T              |
|         |            | 6.2891              | 0.4641 | 3195.2207 | 1073.2                | 31.70% | R.KYTLPPGVDPTLVSSSLSPGTLTVEAPLPK.A |
|         |            | 4.8412              | 0.3077 | 3066.6062 | 1058.6                | 31.00% | K.YTLPPGVDPTLVSSSLSPGTLTVEAPLPK.A  |
|         |            | 3.5492              | 0.3296 | 2223.8394 | 712.6                 | 57.10% | D.PTLVSSSLSPGTLTVEAPLPK.A          |
|         |            | 4.5871              | 0.4357 | 1726.5791 | 1131.4                | 68.80% | S.SSLSPGTLTVEAPLPK.A               |
|         |            | 3.9123              | 0.3541 | 1639.3140 | 1113.0                | 63.30% | S.SLSPGTLTVEAPLPK.A                |
|         |            | 3.6824              | 0.3081 | 1478.3435 | 525.5                 | 61.50% | K.AVTQSAEITIPVTF.E                 |
|         |            | 3.1358              | 0.2339 | 1835.0225 | 562.9                 | 56.30% | K.AVTQSAEITIPVTFEAR.A              |
| 5       | spt P02770 | 2.4303              | 0.3379 | 1149.4395 | 934.6                 | 77.80% | K.LVQEVTDFAK.T                     |
|         |            | 2.6636              | 0.3029 | 1150.9565 | 1202.5                | 88.90% | K.LVQEVTDFAK.T                     |
|         |            | 3.4480              | 0.2492 | 1267.8132 | 2124.6                | 90.00% | R.FPNAEFAEITK.L                    |
|         |            | 3.9458              | 0.4890 | 1466.8833 | 1843.1                | 83.30% | K.LGEYGFQNAVLVR.Y                  |
|         |            | 2.9560              | 0.4658 | 1440.8867 | 833.7                 | 69.20% | K.APQVSTPTLVEAAR.N                 |
|         |            | 2.7229              | 0.3389 | 1102.3169 | 1061.1                | 83.30% | K.KQTALAEVLK.H                     |
|         |            | 1.7945              | 0.0857 | 973.4316  | 196.6                 | 75.00% | K.QTALAEVLK.H                      |
|         |            | 3.1089              | 0.4243 | 1374.3123 | 1116.1                | 81.80% | K.TVM*GDFAQFVDK.C                  |
| 6       | spt P02770 | 2.4996              | 0.3368 | 1149.5049 | 882.9                 | 72.20% | K.LVQEVTDFAK.T                     |
|         |            | 2.6861              | 0.3179 | 1150.7158 | 958.2                 | 83.30% | K.LVQEVTDFAK.T                     |
|         |            | 2.3916              | 0.4303 | 1018.4094 | 843.3                 | 87.50% | K.SIHTLFGDK.L                      |
|         |            | 3.2488              | 0.4628 | 1416.2339 | 1028.9                | 77.30% | R.DNYGELADCCAK.Q                   |
|         |            | 4.0467              | 0.3623 | 1747.0732 | 1089.4                | 76.90% | K.YNEVLTQCCTESDK.A                 |
|         |            | 2.7503              | 0.1998 | 1266.4072 | 733.8                 | 65.00% | R.FPNAEFAEITK.L                    |
|         |            | 3.5012              | 0.2811 | 1269.2114 | 1725.8                | 90.00% | R.FPNAEFAEITK.L                    |
|         |            | 1.7748              | 0.1110 | 1446.2441 | 343.9                 | 50.00% | K.YM*CENQATISSK.L                  |
|         |            | 4.2536              | 0.5347 | 1467.1394 | 1849.6                | 87.50% | K.LGEYGFQNAVLVR.Y                  |
|         |            | 3.1928              | 0.5369 | 1440.5405 | 931.4                 | 73.10% | K.APQVSTPTLVEAAR.N                 |
|         |            | 3.0707              | 0.3525 | 1101.5342 | 1234.6                | 88.90% | K.KQTALAEVLK.H                     |
|         |            | 3.6296              | 0.3527 | 1358.4373 | 1124.3                | 86.40% | K.TVMGDFAQFVDK.C                   |
|         |            | 2.6084              | 0.3904 | 1374.4727 | 915.2                 | 77.30% | K.TVM*GDFAQFVDK.C                  |

| Spot# | Accession#   | XCorr  | DeltCN | ObsM+H+   | SpScore | Ion%   | Sequence                 |
|-------|--------------|--------|--------|-----------|---------|--------|--------------------------|
| 10    | trm Q8VIF7   | 4.4764 | 0.3349 | 1918.5173 | 954.4   | 70.60% | R.NTGIEAPDYLATVDVDPK.S   |
|       |              | 2.6814 | 0.1963 | 1804.4143 | 624.0   | 56.30% | N.TGIEAPDYLATVDVDPK.S    |
|       |              | 3.8266 | 0.3063 | 1233.6353 | 2309.3  | 95.00% | R.IYVVDVGSEPR.A          |
|       |              | 3.3108 | 0.3817 | 1876.9717 | 848.2   | 50.00% | C.LASGEVM*ISSLGDPQNGK.G  |
|       |              | 3.2567 | 0.2764 | 1764.3062 | 777.5   | 52.90% | L.ASGEVM*ISSLGDPQNGK.G   |
|       |              | 3.8538 | 0.2367 | 1511.1768 | 1525.1  | 73.10% | K.GGFVLLDGETFEVK.G       |
|       |              | 3.1880 | 0.2501 | 1250.3320 | 844.6   | 85.00% | F.VLLDGETFEVK.G          |
|       |              | 2.8570 | 0.3237 | 1390.9541 | 800.0   | 70.80% | K.DGFNPAHVEAGLY.G        |
|       |              | 2.8322 | 0.2806 | 1256.8433 | 1054.4  | 83.30% | R.HEIQTLQM*K.D           |
|       |              | 2.2827 | 0.2325 | 1025.9224 | 564.1   | 81.30% | K.DGLIPLEIR.F            |
|       |              | 2.4694 | 0.3321 | 1247.9204 | 1236.9  | 80.00% | R.FLHDPDATQGF.V          |
|       |              | 2.3024 | 0.3582 | 1212.4209 | 444.0   | 60.00% | K.RVPGGPQM*IQL.S         |
|       |              | 2.4244 | 0.2375 | 1712.3577 | 257.3   | 56.70% | K.RVPGGPQM*IQLSLDGK.R    |
|       |              | 3.8456 | 0.2328 | 1713.0358 | 1114.4  | 40.00% | K.RVPGGPQM*IQLSLDGK.R    |
|       |              | 3.8856 | 0.3065 | 1555.2974 | 638.1   | 64.30% | R.VPGGPQM*IQLSLDGK.R     |
|       |              | 3.2950 | 0.2450 | 1360.3252 | 723.3   | 62.50% | P.GGPQM*IQLSLDGK.R       |
|       |              | 2.8381 | 0.3263 | 1264.1636 | 521.9   | 80.00% | K.LNPNFLVDFGK.E          |
| 11    | gb AAA42278. | 2.1028 | 0.3107 | 955.4988  | 593.7   | 92.90% | K.FFVGGNWK.M             |
|       |              | 4.6208 | 0.5541 | 1638.0088 | 1117.4  | 63.30% | K.VTNGAFTGEISPGM*IK.D    |
|       |              | 4.1650 | 0.5529 | 1473.5889 | 813.7   | 83.30% | R.HIFGESDELIGQK.V        |
|       |              | 4.4614 | 0.3929 | 1474.4276 | 1811.5  | 56.30% | R.HIFGESDELIGQK.V        |
|       |              | 3.9728 | 0.4215 | 1328.0879 | 1084.7  | 83.30% | R.IYGGSVTGATCK.E         |
| 12    | gb xm_214823 | 2.5377 | 0.3430 | 906.4391  | 946.1   | 87.50% | K.IAIFGATGR.T            |
|       |              | 3.1001 | 0.2743 | 1212.9834 | 818.9   | 83.30% | R.LQDVTDDHIR.M           |
| 13    | spt O35244   | 4.3344 | 0.4162 | 1364.7817 | 1751.2  | 83.30% | K.DINAYNGAAPTEK.L        |
|       |              | 3.0609 | 0.4426 | 1329.8098 | 1038.1  | 90.00% | K.LPFPIDDKDR.D           |
|       |              | 3.7449 | 0.1878 | 1887.1074 | 835.4   | 62.50% | R.DLAILLGM*LDPAEKDEK.G   |
|       |              | 4.0242 | 0.3039 | 1888.8130 | 543.7   | 37.50% | R.DLAILLGM*LDPAEKDEK.G   |
|       |              | 2.7069 | 0.3722 | 1151.1553 | 868.9   | 77.80% | R.VVFIFGPKK.L            |
|       |              | 3.2520 | 0.3494 | 1194.6328 | 839.7   | 85.00% | K.LSILYPATTGR.N          |
|       |              | 3.4614 | 0.4673 | 2140.2812 | 977.4   | 50.00% | R.VVDSLQLTASNVPVATPDWK.K |
|       |              | 3.5764 | 0.5357 | 1873.6624 | 612.0   | 59.40% | K.KGESVM*VLPTLPEEEAK.Q   |
|       |              | 2.3098 | 0.2626 | 1744.9648 | 270.7   | 46.70% | K.GESVM*VLPTLPEEEAK.Q    |
| 14    | spt P18418   | 2.7255 | 0.1840 | 855.4375  | 856.0   | 91.70% | A.DPAIFYK.E              |
|       |              | 3.1961 | 0.2602 | 1452.9062 | 1123.8  | 77.30% | K.EQFLDGDWATNR.W         |

**Table E2: MALDI-TOF/TOF Data on Peptides Used for Identification with MASCOT**

| PROTEIN  |            | PEPTIDE INFORMATION |           |         |               |                                 |
|----------|------------|---------------------|-----------|---------|---------------|---------------------------------|
| Spot#    | Accession# | Calc.Mass           | Obs. Mass | ppm     | Location(AA#) | Sequence                        |
| 1        | spt P42930 | 831.5087            | 831.5067  | -2      | 6 - 12        | VPFSLLR                         |
|          |            | 831.5087            | 831.5067  | -2      | 6 - 12        | VPFSLLR                         |
|          |            | 987.6097            | 987.5839  | -26     | 5 - 12        | RVPFSLLR                        |
|          |            | 987.6097            | 987.5839  | -26     | 5 - 12        | RVPFSLLR                        |
|          |            | 1031.4694           | 1031.4340 | -34     | 21 - 28       | DWYPAHSR                        |
|          |            | 1104.5068           | 1104.4994 | -7      | 132 - 140     | QDEHGYISR                       |
|          |            | 1104.5068           | 1104.4994 | -7      | 132 - 140     | QDEHGYISR                       |
|          |            | 1149.6051           | 1149.5865 | -16     | 29 - 38       | LFDQAFGVPR                      |
|          |            | 1149.6051           | 1149.5865 | -16     | 29 - 38       | LFDQAFGVPR                      |
|          |            | 1155.5405           | 1155.5280 | -11     | 84 - 93       | QLSSGVSEIR                      |
|          |            | 1160.6521           | 1160.6151 | -32     | 117 - 127     | TKEGVVEITGK                     |
|          |            | 1358.6545           | 1358.6525 | -1      | 193 - 206     | AQIGGPESEQSGAK                  |
|          |            | 1358.6545           | 1358.6525 | -1      | 193 - 206     | AQIGGPESEQSGAK                  |
|          |            | 1711.8972           | 1711.8998 | 2       | 117 - 131     | TKEGVVEITGKHEER                 |
|          |            | 1791.8635           | 1791.7539 | -61     | 117 - 131     | TKEGVVEITGKHEER                 |
|          |            | 1797.9381           | 1797.9266 | -6      | 101 - 116     | VSLDVNHFAPEELTVK                |
|          |            | 1797.9381           | 1797.9266 | -6      | 101 - 116     | VSLDVNHFAPEELTVK                |
|          |            | 1832.9752           | 1832.9673 | -4      | 176 - 192     | AVTQSAEITIPVTFEAR               |
|          |            | 1832.9752           | 1832.9673 | -4      | 176 - 192     | AVTQSAEITIPVTFEAR               |
|          |            | 3193.7241           | 3193.6926 | -10     | 145 - 175     | KYTLPPGVDPTLVSSSLSPGTL-TVEAPLPK |
| 2        | trm Q9JKL7 | 705.3638            | 705.3903  | 38      | 361 - 366     | SASRER                          |
|          |            | 711.1746            | 711.2675  | 131     | 426 - 430     | SSSDR                           |
|          |            | 713.2977            | 713.2594  | -54     | 187 - 191     | SNERK                           |
|          |            | 713.2977            | 713.2594  | -54     | 187 - 191     | SNERK                           |
|          |            | 715.3845            | 715.2716  | -158    | 197 - 202     | SHTRSK                          |
|          |            | 717.4001            | 717.2881  | -156    | 404 - 408     | REKER                           |
|          |            | 725.4069            | 725.2299  | -244    | 383 - 387     | TIKRK                           |
|          |            | 725.4069            | 725.3806  | -36     | 383 - 387     | TIKRK                           |
|          |            | 727.3498            | 727.2833  | -91     | 343 - 347     | EKKS                            |
|          |            | 732.3998            | 732.2963  | -141    | 293 - 298     | DKERGK                          |
|          |            | 733.4315            | 733.2619  | -231    | 214 - 219     | KRSQSK                          |
|          |            | 739.3386            | 739.2449  | -127    | 439 - 444     | TNTPVK                          |
|          |            | 741.3403            | 741.2682  | -97     | 260 - 264     | SRDKR                           |
|          |            | 743.3907            | 743.5441  | 206     | 195 - 200     | SRSRTR                          |
|          |            | 745.4063            | 745.2826  | -166    | 415 - 419     | RERER                           |
|          |            | 745.4063            | 745.5466  | 188     | 415 - 419     | RERER                           |
|          |            | 748.4060            | 748.3260  | -107    | 258 - 263     | SRSRDK                          |
|          |            | 755.3447            | 755.2446  | -133    | 377 - 382     | SPRTSK                          |
|          |            | 755.3560            | 755.2446  | -147    | 264 - 268     | RKDTR                           |
|          |            | 757.3839            | 757.2619  | -161    | 445 - 450     | EKEHSK                          |
| 759.3032 | 759.2674   | -47                 | 425 - 430 | KSSSDR  |               |                                 |
| 763.1711 | 763.2387   | 89                  | 420 - 424 | STSTK   |               |                                 |
| 773.4376 | 773.3375   | -129                | 232 - 237 | QKDRAR  |               |                                 |
| 776.3784 | 776.2974   | -104                | 319 - 324 | EKEQDK  |               |                                 |
| 806.3890 | 806.2072   | -225                | 333 - 339 | SKEADEK |               |                                 |
| 806.3890 | 806.2072   | -225                | 333 - 339 | SKEADEK |               |                                 |
| 808.4159 | 808.3621   | -67                 | 418 - 424 | ERSTSTK |               |                                 |

| Spot#        | Accession#            | Calc.Mass | Obs. Mass | ppm               | Location(AA#) | Sequence                        |
|--------------|-----------------------|-----------|-----------|-------------------|---------------|---------------------------------|
| 2<br>(cont.) | spt P42930<br>(cont.) | 812.3774  | 812.3138  | -78               | 234 - 239     | DRARSK                          |
|              |                       | 831.4907  | 831.6102  | 144               | 250 - 255     | ERRKSR                          |
|              |                       | 861.4649  | 861.3425  | -142              | 361 - 367     | SASRERR                         |
|              |                       | 915.4156  | 915.5764  | 176               | 370 - 376     | RSRSSSR                         |
| 2            | spt P42930            | 831.5087  | 831.4830  | -31               | 6 - 12        | VPFSLLR                         |
|              |                       | 932.4697  | 932.4384  | -34               | 94 - 100      | QTADRWR                         |
|              |                       | 987.6097  | 987.5775  | -33               | 5 - 12        | RVPFSLLR                        |
|              |                       | 987.6097  | 987.5775  | -33               | 5 - 12        | RVPFSLLR                        |
|              |                       | 1104.5068 | 1104.4578 | -44               | 132 - 140     | QDEHGYISR                       |
|              |                       | 1149.6051 | 1149.5756 | -26               | 29 - 38       | LFDQAFGVPR                      |
|              |                       | 1149.6051 | 1149.5756 | -26               | 29 - 38       | LFDQAFGVPR                      |
|              |                       | 1235.5068 | 1235.5165 | 8                 | 84 - 93       | QLSSGVSEIR                      |
|              |                       | 1320.5847 | 1320.5487 | -27               | 117 - 127     | TKEGVVEITGK                     |
|              |                       | 1358.6545 | 1358.6118 | -31               | 193 - 206     | AQIGGPESEQSGAK                  |
|              |                       | 1482.7546 | 1482.7129 | -28               | 119 - 131     | EGVVEITGKHEER                   |
|              |                       | 1609.8057 | 1609.7490 | -35               | 80 - 93       | ALNRQLSSGVSEIR                  |
|              |                       | 1797.9381 | 1797.8723 | -37               | 101 - 116     | VSLDVNHFAPEELTVK                |
|              |                       | 1832.9752 | 1832.9364 | -21               | 176 - 192     | AVTQSAEITIPVTFEAR               |
|              |                       | 1832.9752 | 1832.9364 | -21               | 176 - 192     | AVTQSAEITIPVTFEAR               |
|              |                       | 3225.5618 | 3225.1938 | -114              | 146 - 175     | YTLPPGVDPTLVSSSLSPGET-LTVEAPLPK |
| 3            | spt P42930            | 831.5087  | 831.5099  | 1                 | 6 - 12        | VPFSLLR                         |
|              |                       | 831.5087  | 831.5099  | 1                 | 6 - 12        | VPFSLLR                         |
|              |                       | 931.5094  | 931.4449  | -69               | 119 - 127     | EGVVEITGK                       |
|              |                       | 932.4697  | 932.4798  | 11                | 94 - 100      | QTADRWR                         |
|              |                       | 987.6097  | 987.6098  | 0                 | 5 - 12        | RVPFSLLR                        |
|              |                       | 987.6097  | 987.6098  | 0                 | 5 - 12        | RVPFSLLR                        |
|              |                       | 1075.5741 | 1075.5791 | 5                 | 84 - 93       | QLSSGVSEIR                      |
|              |                       | 1075.5741 | 1075.5791 | 5                 | 84 - 93       | QLSSGVSEIR                      |
|              |                       | 1104.5068 | 1104.5326 | 23                | 132 - 140     | QDEHGYISR                       |
|              |                       | 1149.6051 | 1149.6147 | 8                 | 29 - 38       | LFDQAFGVPR                      |
|              |                       | 1149.6051 | 1149.6147 | 8                 | 29 - 38       | LFDQAFGVPR                      |
|              |                       | 1160.6521 | 1160.6512 | -1                | 117 - 127     | TKEGVVEITGK                     |
|              |                       | 1358.6545 | 1358.6725 | 13                | 193 - 206     | AQIGGPESEQSGAK                  |
|              |                       | 1358.6545 | 1358.6725 | 13                | 193 - 206     | AQIGGPESEQSGAK                  |
|              |                       | 1482.7546 | 1482.7659 | 8                 | 119 - 131     | EGVVEITGKHEER                   |
|              |                       | 1797.9381 | 1797.9668 | 16                | 101 - 116     | VSLDVNHFAPEELTVK                |
| 1797.9381    | 1797.9668             | 16        | 101 - 116 | VSLDVNHFAPEELTVK  |               |                                 |
| 1832.9752    | 1833.0049             | 16        | 176 - 192 | AVTQSAEITIPVTFEAR |               |                                 |
| 1832.9752    | 1833.0049             | 16        | 176 - 192 | AVTQSAEITIPVTFEAR |               |                                 |
| 4            | spt P42930            | 711.3606  | 711.2421  | -167              | 141 - 145     | CFTRK                           |
|              |                       | 831.5087  | 831.5815  | 88                | 6 - 12        | VPFSLLR                         |
|              |                       | 831.5087  | 831.5815  | 88                | 6 - 12        | VPFSLLR                         |
|              |                       | 932.4697  | 932.5396  | 75                | 94 - 100      | QTADRWR                         |
|              |                       | 987.6097  | 987.6885  | 80                | 5 - 12        | RVPFSLLR                        |
|              |                       | 987.6097  | 987.6885  | 80                | 5 - 12        | RVPFSLLR                        |
|              |                       | 1075.5741 | 1075.6676 | 87                | 84 - 93       | QLSSGVSEIR                      |
|              |                       | 1104.5068 | 1104.5941 | 79                | 132 - 140     | QDEHGYISR                       |
|              |                       | 1149.6051 | 1149.6993 | 82                | 29 - 38       | LFDQAFGVPR                      |
|              |                       | 1149.6051 | 1149.6993 | 82                | 29 - 38       | LFDQAFGVPR                      |

| Spot#               | Accession#                   | Calc.Mass | Obs. Mass | ppm                | Location(AA#) | Sequence          |
|---------------------|------------------------------|-----------|-----------|--------------------|---------------|-------------------|
| <b>4</b><br>(cont.) | <b>spt P42930</b><br>(cont.) | 1160.6521 | 1160.7483 | 83                 | 117 - 127     | TKEGVVEITGK       |
|                     |                              | 1358.6545 | 1358.7675 | 83                 | 193 - 206     | AQIGGPESEQSGAK    |
|                     |                              | 1358.6545 | 1358.7675 | 83                 | 193 - 206     | AQIGGPESEQSGAK    |
|                     |                              | 1482.7546 | 1482.8843 | 87                 | 119 - 131     | EGVVEITGKHEER     |
|                     |                              | 1797.9381 | 1798.0830 | 81                 | 101 - 116     | VSLDVNHFapeelTVK  |
|                     |                              | 1797.9381 | 1798.0830 | 81                 | 101 - 116     | VSLDVNHFapeelTVK  |
|                     |                              | 1832.9752 | 1833.1143 | 76                 | 176 - 192     | AVTQSAEITIPVTFEAR |
|                     |                              | 1832.9752 | 1833.1143 | 76                 | 176 - 192     | AVTQSAEITIPVTFEAR |
| <b>5</b>            | <b>spt P02770</b>            | 712.3736  | 712.2482  | -176               | 29 - 34       | SEIAHR            |
|                     |                              | 773.4879  | 773.3152  | -223               | 544 - 549     | EKQIKK            |
|                     |                              | 898.4814  | 898.5781  | 108                | 484 - 490     | LCVLHEK           |
|                     |                              | 973.4737  | 973.5706  | 100                | 37 - 44       | DLGEQHFk          |
|                     |                              | 981.5251  | 981.6461  | 123                | 376 - 383     | KYEATLEK          |
|                     |                              | 1017.5363 | 1017.6387 | 101                | 89 - 97       | SIHTLFGDK         |
|                     |                              | 1056.4666 | 1056.5586 | 87                 | 414 - 421     | TNCELYEK          |
|                     |                              | 1100.6674 | 1100.7806 | 103                | 549 - 558     | KQTALAELVK        |
|                     |                              | 1149.6150 | 1149.7220 | 93                 | 66 - 75       | LVQEVTDFAK        |
|                     |                              | 1149.6150 | 1149.7220 | 93                 | 66 - 75       | LVQEVTDFAK        |
|                     |                              | 1177.6072 | 1177.7050 | 83                 | 25 - 34       | EAHKSEIAHR        |
|                     |                              | 1248.6371 | 1248.7473 | 88                 | 35 - 44       | FKDLGEQHFk        |
|                     |                              | 1248.6371 | 1248.7473 | 88                 | 35 - 44       | FKDLGEQHFk        |
|                     |                              | 1266.6364 | 1266.7523 | 92                 | 247 - 257     | FPNAEFAEITK       |
|                     |                              | 1266.6364 | 1266.7523 | 92                 | 247 - 257     | FPNAEFAEITK       |
|                     |                              | 1299.7056 | 1299.7902 | 65                 | 362 - 372     | HPDYSVSLLLR       |
|                     |                              | 1373.6405 | 1373.7698 | 94                 | 570 - 581     | TVMGDFaQFVDK      |
|                     |                              | 1373.7075 | 1373.7698 | 45                 | 373 - 383     | LAKKYEATLEK       |
|                     |                              | 1439.7852 | 1439.9344 | 104                | 439 - 452     | APQVSTPTLVEAAR    |
|                     |                              | 1439.7852 | 1439.9344 | 104                | 439 - 452     | APQVSTPTLVEAAR    |
|                     |                              | 1447.6191 | 1447.7380 | 82                 | 287 - 298     | YMCENQATISSK      |
|                     |                              | 1455.8066 | 1455.9287 | 84                 | 361 - 372     | RHPDYSVSLLLR      |
|                     |                              | 1459.7395 | 1459.8673 | 88                 | 299 - 310     | LQACCDKPVlQK      |
|                     |                              | 1465.7797 | 1465.9170 | 94                 | 422 - 434     | LGEYGFQNAVLVR     |
|                     |                              | 1465.7797 | 1465.9170 | 94                 | 422 - 434     | LGEYGFQNAVLVR     |
|                     |                              | 1475.6382 | 1475.7833 | 98                 | 497 - 508     | VTkCCSGSLVR       |
|                     |                              | 1608.8717 | 1608.8916 | 12                 | 24 - 36       | REAHKSEIAHRFK     |
|                     |                              | 1609.7896 | 1609.9424 | 95                 | 348 - 360     | DVFLGTFLYEYSR     |
|                     |                              | 1882.9366 | 1883.0856 | 79                 | 509 - 524     | RPCFSALTVDetyVpK  |
|                     |                              | 1927.9554 | 1928.0981 | 74                 | 361 - 375     | RHPDYSVSLLLRLAK   |
| 1948.9181           | 1949.0636                    | 75        | 585 - 602 | AADKDNCFATEGNLVAR  |               |                   |
| 2139.0063           | 2139.1799                    | 81        | 528 - 545 | AETFTFHSDICTLPDKEK |               |                   |
| <b>6</b>            | <b>spt P02770</b>            | 853.4301  | 853.4041  | -30                | 377 - 383     | YEATLEK           |
|                     |                              | 854.4518  | 854.6067  | 181                | 230 - 236     | FGERAFK           |
|                     |                              | 972.5724  | 972.7402  | 173                | 550 - 558     | QTALAELVK         |
|                     |                              | 983.6108  | 983.7801  | 172                | 213 - 221     | ALVAAVRQR         |
|                     |                              | 983.6108  | 983.7801  | 172                | 213 - 221     | ALVAAVRQR         |
|                     |                              | 1019.5784 | 1019.7516 | 170                | 234 - 242     | AFKAWAVAR         |
|                     |                              | 1019.5784 | 1019.7516 | 170                | 234 - 242     | AFKAWAVAR         |
|                     |                              | 1068.5336 | 1068.6460 | 105                | 491 - 499     | TPVSEKVTk         |
|                     |                              | 1100.6674 | 1100.8342 | 152                | 549 - 558     | KQTALAELVK        |
|                     |                              | 1177.6072 | 1177.7963 | 161                | 25 - 34       | EAHKSEIAHR        |
|                     |                              | 1266.6364 | 1266.8376 | 159                | 247 - 257     | FPNAEFAEITK       |
|                     |                              | 1294.7113 | 1294.9287 | 168                | 559 - 569     | HKPKATEDQLK       |
|                     |                              | 1373.7075 | 1373.8804 | 126                | 373 - 383     | LAKKYEATLEK       |
|                     |                              | 1439.7852 | 1440.0203 | 163                | 439 - 452     | APQVSTPTLVEAAR    |

| Spot#        | Accession#            | Calc.Mass | Obs. Mass | ppm                    | Location(AA#) | Sequence           |
|--------------|-----------------------|-----------|-----------|------------------------|---------------|--------------------|
| 6<br>(cont.) | spt P02770<br>(cont.) | 1452.7705 | 1453.1089 | 233                    | 25 - 36       | EAHKSEIAHRFK       |
|              |                       | 1455.8066 | 1456.0656 | 178                    | 361 - 372     | RHPDYSVSLLLR       |
|              |                       | 1459.7395 | 1459.9739 | 161                    | 299 - 310     | LQACCDKPVLLQK      |
|              |                       | 1459.7395 | 1459.9739 | 161                    | 299 - 310     | LQACCDKPVLLQK      |
|              |                       | 1462.8739 | 1462.9528 | 54                     | 550 - 562     | QTALAEVLKHKPK      |
|              |                       | 1469.9049 | 1470.1312 | 154                    | 546 - 558     | QIKKQTALAEVLK      |
|              |                       | 1482.9001 | 1483.1193 | 148                    | 206 - 219     | LDAVKEKALVAAVR     |
|              |                       | 1508.8120 | 1509.0660 | 168                    | 230 - 242     | FGERAFKAWAVAR      |
|              |                       | 1684.7417 | 1684.9832 | 143                    | 104 - 117     | LRDNYGELADCCAK     |
|              |                       | 1784.8635 | 1785.1210 | 144                    | 243 - 257     | MSQRFNPAEFAEITK    |
|              |                       | 1784.8635 | 1785.1210 | 144                    | 243 - 257     | MSQRFNPAEFAEITK    |
|              |                       | 1880.0348 | 1880.3132 | 148                    | 439 - 456     | APQVSTPTLVEAARNLGR |
|              |                       | 1948.9181 | 1949.2083 | 149                    | 585 - 602     | AADKDNCFATEGPNLVAR |
|              |                       | 1948.9181 | 1949.2083 | 149                    | 585 - 602     | AADKDNCFATEGPNLVAR |
|              |                       | 1960.0498 | 1960.3339 | 145                    | 435 - 452     | YTQKAPQVSTPTLVEAAR |
|              |                       | 1960.2065 | 1960.3339 | 65                     | 546 - 562     | QIKKQTALAEVLKHKPK  |
| 1962.9031    | 1963.2792             | 192       | 509 - 524 | RPCFSALTVDETYVPK       |               |                    |
| 2400.2993    | 2400.6267             | 136       | 435 - 456 | YTQKAPQVSTPTLVEAARNLGR |               |                    |
| Spot#        | Accession#            | Calc.Mass | Obs. Mass | ppm                    | Location(AA#) | Sequence           |
| 7            | spt P02770            | 747.4247  | 747.4981  | 98                     | 258 - 264     | LATDVTK            |
|              |                       | 802.4669  | 802.4782  | 14                     | 206 - 212     | LDAVKEK            |
|              |                       | 840.3685  | 840.5134  | 172                    | 199 - 205     | AACLTPK            |
|              |                       | 854.4518  | 854.2507  | -235                   | 230 - 236     | FGERAFK            |
|              |                       | 898.4814  | 898.5071  | 29                     | 484 - 490     | LCVLHEK            |
|              |                       | 973.4737  | 973.4804  | 7                      | 37 - 44       | DLGEQHFK           |
|              |                       | 981.5251  | 981.5096  | -16                    | 376 - 383     | KYEATLEK           |
|              |                       | 1075.4989 | 1075.5139 | 14                     | 123 - 130     | NECFQLQHK          |
|              |                       | 1100.6674 | 1100.6588 | -8                     | 549 - 558     | KQTALAEVLK         |
|              |                       | 1134.5031 | 1134.4911 | -11                    | 461 - 469     | CCTLPEAQR          |
|              |                       | 1149.6150 | 1149.6134 | -1                     | 66 - 75       | LVQEVTDFAK         |
|              |                       | 1149.6150 | 1149.6134 | -1                     | 66 - 75       | LVQEVTDFAK         |
|              |                       | 1177.6072 | 1177.6079 | 1                      | 25 - 34       | EAHKSEIAHR         |
|              |                       | 1248.6371 | 1248.6432 | 5                      | 35 - 44       | FKDLGEQHFK         |
|              |                       | 1266.6364 | 1266.6389 | 2                      | 247 - 257     | FPNAEFAEITK        |
|              |                       | 1266.6364 | 1266.6389 | 2                      | 247 - 257     | FPNAEFAEITK        |
|              |                       | 1373.6405 | 1373.6349 | -4                     | 570 - 581     | TVMGDFAQFVDK       |
|              |                       | 1439.7852 | 1439.7791 | -4                     | 439 - 452     | APQVSTPTLVEAAR     |
|              |                       | 1439.7852 | 1439.7791 | -4                     | 439 - 452     | APQVSTPTLVEAAR     |
|              |                       | 1447.6191 | 1447.6040 | -10                    | 287 - 298     | YMCENQATISSK       |
|              |                       | 1455.8066 | 1455.8033 | -2                     | 361 - 372     | RHPDYSVSLLLR       |
|              |                       | 1455.8066 | 1455.8033 | -2                     | 361 - 372     | RHPDYSVSLLLR       |
|              |                       | 1465.7797 | 1465.7775 | -2                     | 422 - 434     | LGEYGFQNAVLVR      |
|              |                       | 1465.7797 | 1465.7775 | -2                     | 422 - 434     | LGEYGFQNAVLVR      |
|              |                       | 1475.6382 | 1475.7694 | 89                     | 497 - 508     | VTKCCSGSLVER       |
|              |                       | 1609.7896 | 1609.7916 | 1                      | 348 - 360     | DVFLGTFLYEYSR      |
|              |                       | 1609.7896 | 1609.7916 | 1                      | 348 - 360     | DVFLGTFLYEYSR      |
|              |                       | 1784.8635 | 1784.8472 | -9                     | 243 - 257     | MSQRFNPAEFAEITK    |
|              |                       | 1882.9366 | 1882.9281 | -5                     | 509 - 524     | RPCFSALTVDETYVPK   |
|              |                       | 1948.9181 | 1948.9127 | -3                     | 585 - 602     | AADKDNCFATEGPNLVAR |
|              |                       | 1960.0498 | 1960.0521 | 1                      | 435 - 452     | YTQKAPQVSTPTLVEAAR |
|              |                       | 1960.0498 | 1960.0521 | 1                      | 435 - 452     | YTQKAPQVSTPTLVEAAR |

| Spot#     | Accession# | Calc.Mass | Obs. Mass | ppm                    | Location(AA#) | Sequence          |
|-----------|------------|-----------|-----------|------------------------|---------------|-------------------|
| 8         | spt P11884 | 706.4497  | 706.5089  | 84                     | 372 - 377     | ILGYIK            |
|           |            | 711.3549  | 711.2040  | -212                   | 341 - 346     | SVARAK            |
|           |            | 816.4825  | 816.5312  | 60                     | 284 - 291     | VTLELGGK          |
|           |            | 829.4777  | 829.5327  | 66                     | 110 - 116     | LADLIER           |
|           |            | 834.5447  | 834.5941  | 59                     | 371 - 377     | KILGYIK           |
|           |            | 902.4941  | 902.5488  | 61                     | 431 - 438     | TIEEVVGR          |
|           |            | 972.5836  | 972.5706  | -13                    | 283 - 291     | RVTLELGGK         |
|           |            | 990.5002  | 990.5508  | 51                     | 349 - 357     | VVGNPFDSR         |
|           |            | 990.5002  | 990.5508  | 51                     | 349 - 357     | VVGNPFDSR         |
|           |            | 999.6196  | 999.6630  | 43                     | 509 - 517     | TVTVKVPQK         |
|           |            | 1040.5774 | 1040.6255 | 46                     | 444 - 453     | YGLAAAVFTK        |
|           |            | 1040.5774 | 1040.6255 | 46                     | 444 - 453     | YGLAAAVFTK        |
|           |            | 1060.5204 | 1060.5723 | 49                     | 386 - 396     | LLCGGGAAADR       |
|           |            | 1100.6058 | 1100.6571 | 47                     | 110 - 118     | LADLIERDR         |
|           |            | 1100.6058 | 1100.6571 | 47                     | 110 - 118     | LADLIERDR         |
|           |            | 1114.6803 | 1114.6500 | -27                    | 2 - 11        | LRAALSTARR        |
|           |            | 1177.6575 | 1177.7216 | 54                     | 429 - 438     | FKTIEEVVGR        |
|           |            | 1177.6575 | 1177.7216 | 54                     | 429 - 438     | FKTIEEVVGR        |
|           |            | 1233.6334 | 1233.6995 | 54                     | 347 - 357     | SRVVGNPFDSR       |
|           |            | 1369.7871 | 1369.8557 | 50                     | 198 - 211     | LGPALATGNVVVMK    |
|           |            | 1385.7820 | 1385.8307 | 35                     | 198 - 211     | LGPALATGNVVVMK    |
|           |            | 1419.7551 | 1419.8225 | 47                     | 417 - 428     | EEIFGPVMQILK      |
|           |            | 1458.6801 | 1458.7479 | 46                     | 150 - 161     | YYAGWADKYHGK      |
|           |            | 1470.7627 | 1470.8246 | 42                     | 397 - 409     | GYFIQPTVFGDVK     |
|           |            | 1470.7627 | 1470.8246 | 42                     | 397 - 409     | GYFIQPTVFGDVK     |
|           |            | 1506.7070 | 1506.7605 | 36                     | 358 - 370     | TEQGPQVDETQFK     |
|           |            | 1531.7427 | 1531.8103 | 44                     | 162 - 174     | TIPIDGDFFSYTR     |
|           |            | 1599.7900 | 1599.8579 | 42                     | 495 - 508     | ELGEYGLQAYTEVK    |
|           |            | 1634.8020 | 1634.8657 | 39                     | 358 - 371     | TEQGPQVDETQFKK    |
|           |            | 1775.8121 | 1775.8870 | 42                     | 327 - 340     | TFVQEDVYDEFVER    |
|           |            | 1775.8121 | 1775.8870 | 42                     | 327 - 340     | TFVQEDVYDEFVER    |
|           |            | 1844.0527 | 1844.1237 | 39                     | 212 - 228     | VAEQTPLTALYVANLIK |
|           |            | 1844.0527 | 1844.1237 | 39                     | 212 - 228     | VAEQTPLTALYVANLIK |
| 2152.1028 | 2152.1655  | 29        | 410 - 428 | DGMTIAKEEIFGPVMQILK    |               |                   |
| 2478.1895 | 2478.2671  | 31        | 349 - 370 | VVGNPFDSRTEQGPQVDETQFK |               |                   |
| 9         | trm Q8VIF7 | 1025.5989 | 1025.6180 | 19                     | 246 - 254     | DGLIPLEIR         |
|           |            | 1025.5989 | 1025.6180 | 19                     | 246 - 254     | DGLIPLEIR         |
|           |            | 1050.5730 | 1050.5781 | 5                      | 412 - 419     | QFYPNLIR          |
|           |            | 1098.6881 | 1098.6942 | 6                      | 94 - 103      | LILPSIISR         |
|           |            | 1106.5112 | 1106.5500 | 35                     | 280 - 289     | NEGGTWSVEK        |
|           |            | 1149.6262 | 1149.6129 | -12                    | 121 - 130     | VIEPNEIHAK        |
|           |            | 1223.6279 | 1223.6302 | 2                      | 53 - 62       | SPHYSQVIHR        |
|           |            | 1223.6279 | 1223.6302 | 2                      | 53 - 62       | SPHYSQVIHR        |
|           |            | 1233.6473 | 1233.6566 | 8                      | 104 - 114     | IYVVDVGSEPR       |
|           |            | 1233.6473 | 1233.6566 | 8                      | 104 - 114     | IYVVDVGSEPR       |
|           |            | 1256.6667 | 1256.6385 | -22                    | 236 - 245     | HEIIQTLQMK        |
|           |            | 1302.7164 | 1302.7399 | 18                     | 449 - 460     | EPLGPALAHCLR      |
|           |            | 1320.6381 | 1320.5957 | -32                    | 236 - 245     | HEIIQTLQMK        |
|           |            | 1332.7885 | 1332.7766 | -9                     | 345 - 357     | LTGQIFLGGSIK      |
|           |            | 1383.5605 | 1383.7026 | 103                    | 53 - 62       | SPHYSQVIHR        |
|           |            | 1510.7787 | 1510.8007 | 15                     | 161 - 174     | GGFVLLDGETFEVK    |
|           |            | 1510.7787 | 1510.8007 | 15                     | 161 - 174     | GGFVLLDGETFEVK    |
|           |            | 1667.8328 | 1667.8281 | -3                     | 321 - 333     | FLYFSNWLHGDIR     |

| Spot#        | Accession#            | Calc.Mass | Obs. Mass | ppm                  | Location(AA#) | Sequence                |
|--------------|-----------------------|-----------|-----------|----------------------|---------------|-------------------------|
| 9<br>(cont.) | trm Q8VIF7<br>(cont.) | 1711.9159 | 1711.9235 | 4                    | 383 - 398     | VPGGPQMIQLSLDGKR        |
|              |                       | 1711.9159 | 1711.9235 | 4                    | 383 - 398     | VPGGPQMIQLSLDGKR        |
|              |                       | 1791.8822 | 1791.7504 | -74                  | 383 - 398     | VPGGPQMIQLSLDGKR        |
|              |                       | 1868.0170 | 1868.0144 | -1                   | 382 - 398     | RVPGGPQMIQLSLDGKR       |
|              |                       | 1917.9440 | 1917.9407 | -2                   | 35 - 52       | NTGIEAPDYLATVDVDPK      |
|              |                       | 2433.1614 | 2433.1833 | 9                    | 255 - 276     | FLHDPDATQGFVGCALSSNIQR  |
|              |                       | 2547.3716 | 2547.4021 | 12                   | 438 - 460     | LNPNFLVDFGKEPLGPALAEHLR |
| Spot#        | Accession#            | Calc.Mass | Obs. Mass | ppm                  | Location(AA#) | Sequence                |
| 11           | gb AAA42278.          | 772.4828  | 772.4880  | 7                    | 189 - 194     | LRGWLK                  |
|              |                       | 850.4669  | 850.4608  | -7                   | 143 - 149     | VVFEQTK                 |
|              |                       | 850.4669  | 850.4608  | -7                   | 143 - 149     | VVFEQTK                 |
|              |                       | 954.4832  | 954.4739  | -10                  | 7 - 14        | FFVGGNWK                |
|              |                       | 954.4832  | 954.4739  | -10                  | 7 - 14        | FFVGGNWK                |
|              |                       | 1082.5781 | 1082.5677 | -10                  | 6 - 14        | KFFVGGNWK               |
|              |                       | 1137.5720 | 1137.5619 | -9                   | 60 - 69       | IAVAAQNCYK              |
|              |                       | 1137.5720 | 1137.5619 | -9                   | 60 - 69       | IAVAAQNCYK              |
|              |                       | 1260.6429 | 1260.6312 | -9                   | 132 - 142     | LDEREAGITEK             |
|              |                       | 1319.6412 | 1319.6234 | -13                  | 150 - 160     | AIADNVKDWCK             |
|              |                       | 1326.6721 | 1326.6617 | -8                   | 207 - 219     | IIYGGSVTGATCK           |
|              |                       | 1326.6721 | 1326.6617 | -8                   | 207 - 219     | IIYGGSVTGATCK           |
|              |                       | 1380.5994 | 1380.5972 | -2                   | 195 - 206     | CNVSEGVAQCTR            |
|              |                       | 1462.7391 | 1462.6682 | -48                  | 21 - 33       | CLGELICTLNAAK           |
|              |                       | 1466.7234 | 1466.7072 | -11                  | 176 - 188     | TATPQQAQEVHEK           |
|              |                       | 1466.7234 | 1466.7072 | -11                  | 176 - 188     | TATPQQAQEVHEK           |
|              |                       | 1472.7379 | 1472.7249 | -9                   | 101 - 113     | HIFGESDELIGQK           |
|              |                       | 1539.7914 | 1539.7760 | -10                  | 86 - 99       | DLGATWVVLGHSER          |
|              |                       | 1602.8889 | 1602.8660 | -14                  | 161 - 175     | VVLAYEPVWAIGTGK         |
|              |                       | 1621.8253 | 1621.8206 | -3                   | 70 - 85       | VTNGAFTGEISPGMIK        |
|              |                       | 1628.8390 | 1628.8284 | -7                   | 100 - 113     | RHIFGESDELIGQK          |
|              |                       | 1637.8202 | 1637.7958 | -15                  | 70 - 85       | VTNGAFTGEISPGMIK        |
| 1637.8202    | 1637.7958             | -15       | 70 - 85   | VTNGAFTGEISPGMIK     |               |                         |
| 1695.8925    | 1695.8700             | -13       | 86 - 100  | DLGATWVVLGHSERR      |               |                         |
| 2206.0847    | 2206.0662             | -8        | 34 - 53   | LPADTEVVCAPPTAYIDFAR |               |                         |
| 2206.0847    | 2206.0662             | -8        | 34 - 53   | LPADTEVVCAPPTAYIDFAR |               |                         |
| Spot#        | Accession#            | Calc.Mass | Obs. Mass | ppm                  | Location(AA#) | Sequence                |
| 14           | spt P18418            | 737.4191  | 737.4893  | 95                   | 49 - 55       | FVLSSGK                 |
|              |                       | 778.2849  | 778.2370  | -62                  | 386 - 391     | EEDDDR                  |
|              |                       | 817.3855  | 817.3039  | -100                 | 49 - 55       | FVLSSGK                 |
|              |                       | 827.4410  | 827.5192  | 95                   | 74 - 80       | FYALSAR                 |
|              |                       | 827.4410  | 827.5192  | 95                   | 74 - 80       | FYALSAR                 |
|              |                       | 868.4199  | 868.4874  | 78                   | 81 - 87       | FEPFSNK                 |
|              |                       | 886.3940  | 886.5093  | 130                  | 56 - 62       | FYGDQEK                 |
|              |                       | 974.5305  | 974.6174  | 89                   | 112 - 120     | LFPGGLDQK               |
|              |                       | 974.5305  | 974.6174  | 89                   | 112 - 120     | LFPGGLDQK               |
|              |                       | 975.4854  | 975.6154  | 133                  | 65 - 73       | GLQTSQDAR               |
|              |                       | 1019.5672 | 1019.6729 | 104                  | 144 - 151     | VHVIFNYK                |
|              |                       | 1084.6472 | 1084.7480 | 93                   | 154 - 162     | NVLINKDIR               |
|              |                       | 1084.6472 | 1084.7480 | 93                   | 154 - 162     | NVLINKDIR               |
|              |                       | 1129.5160 | 1129.6304 | 101                  | 56 - 64       | FYGDQEKDK               |
|              |                       | 1129.5160 | 1129.6304 | 101                  | 56 - 64       | FYGDQEKDK               |
|              |                       | 1204.6836 | 1204.7780 | 78                   | 144 - 153     | VHVIFNYKGGK             |
|              |                       | 1271.6630 | 1271.7698 | 84                   | 44 - 55       | SDFGKFVLSSGK            |
|              |                       | 2085.9834 | 2086.1707 | 90                   | 56 - 73       | FYGDQEKDKGLQTSQDAR      |
